# Supplementary material
Source: PubMed Central journal article supplement (PMC8216957)
Supplement: mmc1.pdf [file mmc1.pdf]

# THE LANCET

## Digital Health

### Supplementary appendix

This appendix formed part of the original submission and has been peer reviewed. We post it as supplied by the authors.

Supplement to: Nafilyan V, Humberstone B, Mehta N, et al. An external validation of the QCovid risk prediction algorithm for risk of mortality from COVID-19 in adults: a national validation cohort study in England. *Lancet Digit Health* 2021; published online May 25. [https://doi.org/10.1016/S2589-7500\(21\)00080-7](https://doi.org/10.1016/S2589-7500(21)00080-7).

**Supplementary material - An external validation of the QCovid risk prediction algorithm for risk of mortality from COVID-19 in adults: national validation cohort study in England**

**Appendix**

**Supplementary Table 1: Population and Covid-19 deaths in the ONS Public Health Data Asset compared to England (up to 28<sup>th</sup> July 2020)**

|                    | Population    |            |            | COVID-19 deaths        |                     |            |
|--------------------|---------------|------------|------------|------------------------|---------------------|------------|
|                    | In the Cohort | England    | Proportion | Recorded in the Cohort | Recorded in England | Proportion |
| East Midlands      | 3,137,521     | 3,779,186  | 83.0%      | 3,351                  | 3,977               | 84.3%      |
| East of England    | 3,987,067     | 4,822,148  | 82.7%      | 4,005                  | 5,113               | 78.3%      |
| London             | 4,662,731     | 6,834,636  | 68.2%      | 6,359                  | 8,570               | 74.2%      |
| North East         | 1,755,316     | 2,108,996  | 83.2%      | 2,360                  | 2,834               | 83.3%      |
| North West         | 4,643,947     | 5,696,784  | 81.5%      | 6,700                  | 7,923               | 84.6%      |
| South East         | 5,818,470     | 7,107,605  | 81.9%      | 6,123                  | 7,374               | 83.0%      |
| South West         | 3,674,549     | 4,457,165  | 82.4%      | 2,402                  | 2,916               | 82.4%      |
| West Midlands      | 3,643,447     | 4,566,619  | 79.8%      | 4,781                  | 5,898               | 81.1%      |
| Yorkshire & Humber | 3,574,600     | 4,271,381  | 83.7%      | 4,081                  | 4,856               | 84.0%      |
| England            | 34,897,648    | 43,644,520 | 80.0%      | 40,162                 | 49,461              | 81.2%      |

Note: Population for England and deaths that occurred in England are for people 19 or over, whilst our cohort is limited to people aged between 19 and 100. Source: Population for England: [Estimates of the population for the UK, England and Wales, Scotland and Northern Ireland](#) (ONS); Deaths in England: [Deaths registered weekly in England and Wales, provisional](#) (ONS).

**Supplementary Table 2: Performance of the risk models to predict risk of COVID-19 death in 14,104,452 patients registered with practices using the TPP System**

|                          | Period 1<br>(24/01/2020 -<br>30/04/2020) |                             | Period 2<br>(01/05/2020 -<br>28/07/2020) |                             |
|--------------------------|------------------------------------------|-----------------------------|------------------------------------------|-----------------------------|
|                          | COVID -19<br>death<br>females            | COVID -19<br>death<br>males | COVID -19<br>death<br>females            | COVID -19<br>death<br>males |
|                          | Estimate (95%<br>CI)                     | Estimate (95%<br>CI)        | Estimate (95%<br>CI)                     | Estimate (95%<br>CI)        |
| R <sup>2</sup> statistic | 0.778<br>(0.773 to 0.783)                | 0.785<br>(0.780 to 0.790)   | 0.769<br>(0.763 to 0.775)                | 0.766<br>(0.760 to 0.772)   |
| D statistic              | 3.833<br>(3.775 to 3.892)                | 3.911<br>(3.857 to 3.965)   | 3.731<br>(3.669 to 3.793)                | 3.704<br>(3.639 to 3.769)   |
| Harrell's C<br>statistic | 0.945<br>(0.942 to 0.948)                | 0.934<br>(0.931 to 0.937)   | 0.957<br>(0.953 to 0.960)                | 0.948<br>(0.945 to 0.952)   |
| Brier score              | 0.0011                                   | 0.0015                      | 0.0007                                   | 0.0008                      |

**Supplementary Table 3: Performance of the risk models to predict risk of COVID-19 death in patients registered with valid BMI information**

|                              | Period 1 (24/01/2020 -30/04/2020) |                          | Period 2 (01/05/2020 -28/07/2020) |                          |
|------------------------------|-----------------------------------|--------------------------|-----------------------------------|--------------------------|
|                              | COVID -19 death<br>females        | COVID -19 death<br>males | COVID -19 death<br>females        | COVID -19 death<br>males |
|                              | Estimate (95% CI)                 | Estimate (95% CI)        | Estimate (95% CI)                 | Estimate (95% CI)        |
| R <sup>2</sup> statistic (%) | 0.752 (0.748 to 0.756)            | 0.767 (0.763 to 0.770)   | 0.765 (0.760 to 0.770)            | 0.752 (0.746 to 0.758)   |
| D statistic                  | 3.564 (3.525 to 3.604)            | 3.711 (3.673 to 3.750)   | 3.693 (3.637 to 3.749)            | 3.564 (3.505 to 3.623)   |
| Harrell's C statistic        | 0.944 (0.942 to 0.946)            | 0.926 (0.924 to 0.929)   | 0.955 (0.952 to 0.957)            | 0.933 (0.930 to 0.937)   |
| Brier score                  | 0.0013                            | 0.0023                   | 0.0007                            | 0.0009                   |

**Supplementary Table 4: Performance of the risk models to predict risk of COVID-19 death between 01/05/2020 and 30/06/2020**

|                              | 01/05/2020 -30/06/2020     |                          |
|------------------------------|----------------------------|--------------------------|
|                              | COVID -19 death<br>females | COVID -19 death<br>males |
|                              | Estimate (95% CI)          | Estimate (95% CI)        |
| R <sup>2</sup> statistic (%) | 0.766 (0.762 to 0.769)     | 0.771 (0.767 to 0.775)   |
| D statistic                  | 3.699 (3.660 to 3.738)     | 3.752 (3.709 to 3.796)   |
| Harrell's C statistic        | 0.956 (0.954 to 0.958)     | 0.945 (0.942 to 0.947)   |
| Brier score                  | 0.0007                     | 0.0007                   |

**Supplementary Table 5: Performance of the risk models to predict risk of COVID-19 death in the validation cohort by subgroup using Harrell's C statistic (95% CI).**

|          | Period 1 (24/01/2020 -30/04/2020) |                          | Period 2 (01/05/2020 -28/07/2020) |                          |
|----------|-----------------------------------|--------------------------|-----------------------------------|--------------------------|
|          | COVID -19 death<br>females        | COVID -19 death<br>males | COVID -19 death<br>females        | COVID -19 death<br>males |
| Age band |                                   |                          |                                   |                          |

|                          |                        |                        |                        |                        |
|--------------------------|------------------------|------------------------|------------------------|------------------------|
| 19-40                    | 0.810 (0.753 to 0.866) | 0.833 (0.784 to 0.881) | 0.800 (0.676 to 0.925) | 0.786 (0.685 to 0.886) |
| 40-45                    | 0.856 (0.798 to 0.913) | 0.811 (0.758 to 0.865) | 0.746 (0.659 to 0.833) | 0.763 (0.667 to 0.860) |
| 45-50                    | 0.849 (0.808 to 0.890) | 0.841 (0.809 to 0.872) | 0.809 (0.723 to 0.895) | 0.768 (0.692 to 0.843) |
| 50-55                    | 0.874 (0.847 to 0.901) | 0.834 (0.808 to 0.860) | 0.782 (0.716 to 0.849) | 0.779 (0.731 to 0.827) |
| 55-60                    | 0.844 (0.819 to 0.869) | 0.796 (0.774 to 0.818) | 0.805 (0.754 to 0.856) | 0.809 (0.776 to 0.842) |
| 60-65                    | 0.851 (0.831 to 0.872) | 0.808 (0.791 to 0.825) | 0.818 (0.777 to 0.858) | 0.788 (0.758 to 0.819) |
| 65-70                    | 0.844 (0.826 to 0.861) | 0.803 (0.789 to 0.817) | 0.787 (0.755 to 0.819) | 0.817 (0.794 to 0.839) |
| 70-75                    | 0.851 (0.837 to 0.865) | 0.796 (0.785 to 0.807) | 0.857 (0.838 to 0.876) | 0.826 (0.810 to 0.842) |
| 75-80                    | 0.846 (0.835 to 0.857) | 0.808 (0.798 to 0.817) | 0.839 (0.824 to 0.855) | 0.821 (0.807 to 0.835) |
| 80-85                    | 0.819 (0.810 to 0.828) | 0.787 (0.779 to 0.796) | 0.828 (0.816 to 0.840) | 0.803 (0.791 to 0.815) |
| 85-90                    | 0.793 (0.784 to 0.802) | 0.768 (0.759 to 0.777) | 0.785 (0.774 to 0.797) | 0.755 (0.742 to 0.769) |
| 90+                      | 0.736 (0.727 to 0.744) | 0.729 (0.719 to 0.740) | 0.750 (0.740 to 0.760) | 0.720 (0.705 to 0.735) |
|                          |                        |                        |                        |                        |
| <b>Ethnicity</b>         |                        |                        |                        |                        |
| Bangladeshi              | 0.942 (0.918 to 0.966) | 0.939 (0.921 to 0.957) | 0.932 (0.891 to 0.973) | 0.918 (0.863 to 0.974) |
| Black African            | 0.888 (0.859 to 0.917) | 0.906 (0.888 to 0.925) | 0.839 (0.743 to 0.935) | 0.908 (0.870 to 0.946) |
| Black Caribbean          | 0.924 (0.912 to 0.937) | 0.930 (0.920 to 0.939) | 0.939 (0.914 to 0.965) | 0.921 (0.890 to 0.951) |
| Chinese                  | 0.960 (0.937 to 0.984) | 0.914 (0.877 to 0.950) | 0.927 (0.861 to 0.993) | 0.955 (0.913 to 0.997) |
| Indian                   | 0.939 (0.929 to 0.949) | 0.916 (0.906 to 0.926) | 0.929 (0.907 to 0.950) | 0.901 (0.878 to 0.924) |
| Mixed                    | 0.947 (0.923 to 0.972) | 0.972 (0.961 to 0.984) | 0.980 (0.966 to 0.994) | 0.963 (0.946 to 0.979) |
| Other                    | 0.935 (0.919 to 0.950) | 0.905 (0.892 to 0.918) | 0.883 (0.826 to 0.939) | 0.905 (0.880 to 0.930) |
| Pakistani                | 0.918 (0.899 to 0.937) | 0.923 (0.908 to 0.937) | 0.948 (0.926 to 0.971) | 0.897 (0.865 to 0.930) |
| White British            | 0.946 (0.944 to 0.948) | 0.935 (0.933 to 0.937) | 0.956 (0.954 to 0.958) | 0.947 (0.944 to 0.949) |
| White other              | 0.963 (0.956 to 0.969) | 0.950 (0.943 to 0.957) | 0.968 (0.956 to 0.981) | 0.951 (0.939 to 0.963) |
|                          |                        |                        |                        |                        |
| <b>Townsend quintile</b> |                        |                        |                        |                        |
| 1 (most affluent)        | 0.945 (0.940 to 0.949) | 0.933 (0.929 to 0.937) | 0.961 (0.957 to 0.965) | 0.949 (0.944 to 0.954) |
| 2                        | 0.945 (0.940 to 0.949) | 0.935 (0.932 to 0.939) | 0.955 (0.951 to 0.960) | 0.947 (0.942 to 0.952) |

|                   |                        |                        |                        |                        |
|-------------------|------------------------|------------------------|------------------------|------------------------|
| 3                 | 0.947 (0.943 to 0.951) | 0.933 (0.929 to 0.937) | 0.958 (0.954 to 0.963) | 0.945 (0.940 to 0.950) |
| 4                 | 0.946 (0.942 to 0.949) | 0.938 (0.935 to 0.942) | 0.956 (0.952 to 0.960) | 0.944 (0.939 to 0.950) |
| 5 (most deprived) | 0.943 (0.939 to 0.947) | 0.934 (0.930 to 0.937) | 0.952 (0.946 to 0.957) | 0.936 (0.930 to 0.942) |

**Supplementary Table 6: D statistic of the risk models to predict risk of COVID-19 death in the validation cohort by subgroup**

|                  | Period 1 (24/01/2020 -30/04/2020) |                        | Period 2 (01/05/2020 -28/07/2020) |                        |
|------------------|-----------------------------------|------------------------|-----------------------------------|------------------------|
|                  | COVID -19 death                   | COVID -19 death        | COVID -19 death                   | COVID -19 death        |
|                  | females                           | males                  | females                           | males                  |
| <b>Age band</b>  |                                   |                        |                                   |                        |
| 19-40            | 2.175 (1.808 to 2.541)            | 2.551 (2.192 to 2.910) | 2.376 (1.631 to 3.121)            | 1.857 (1.230 to 2.484) |
| 40-45            | 2.537 (2.052 to 3.022)            | 2.212 (1.826 to 2.598) | 1.360 (0.641 to 2.078)            | 1.573 (0.942 to 2.204) |
| 45-50            | 2.660 (2.320 to 3.001)            | 2.331 (2.053 to 2.610) | 1.966 (1.426 to 2.505)            | 1.865 (1.401 to 2.329) |
| 50-55            | 2.627 (2.378 to 2.876)            | 2.355 (2.144 to 2.566) | 1.961 (1.522 to 2.400)            | 1.780 (1.462 to 2.099) |
| 55-60            | 2.434 (2.226 to 2.641)            | 2.099 (1.943 to 2.255) | 1.946 (1.607 to 2.285)            | 2.028 (1.773 to 2.283) |
| 60-65            | 2.603 (2.427 to 2.779)            | 2.260 (2.129 to 2.390) | 2.003 (1.734 to 2.271)            | 1.923 (1.713 to 2.133) |
| 65-70            | 2.433 (2.284 to 2.583)            | 2.299 (2.185 to 2.414) | 1.904 (1.694 to 2.115)            | 2.094 (1.918 to 2.269) |
| 70-75            | 2.735 (2.610 to 2.860)            | 2.273 (2.182 to 2.365) | 2.668 (2.497 to 2.839)            | 2.405 (2.268 to 2.541) |
| 75-80            | 2.609 (2.513 to 2.705)            | 2.241 (2.168 to 2.314) | 2.454 (2.318 to 2.590)            | 2.297 (2.187 to 2.408) |
| 80-85            | 2.304 (2.229 to 2.378)            | 2.135 (2.071 to 2.199) | 2.285 (2.188 to 2.382)            | 2.218 (2.123 to 2.312) |
| 85-90            | 2.011 (1.945 to 2.077)            | 1.800 (1.739 to 1.861) | 1.945 (1.861 to 2.030)            | 1.739 (1.652 to 1.826) |
| 90+              | 1.444 (1.385 to 1.503)            | 1.446 (1.381 to 1.511) | 1.327 (1.263 to 1.392)            | 1.347 (1.254 to 1.440) |
|                  |                                   |                        |                                   |                        |
| <b>Ethnicity</b> |                                   |                        |                                   |                        |
| Bangladeshi      | 3.370 (2.920 to 3.820)            | 4.803 (4.345 to 5.261) | 3.666 (2.323 to 5.010)            | 2.828 (2.073 to 3.582) |
| Black African    | 3.560 (3.199 to 3.920)            | 3.435 (3.196 to 3.675) | 2.648 (1.845 to 3.451)            | 2.739 (2.247 to 3.232) |
| Black Caribbean  | 3.973 (3.692 to 4.254)            | 3.426 (3.259 to 3.594) | 3.670 (3.075 to 4.266)            | 3.314 (2.922 to 3.705) |
| Chinese          | 4.408 (3.753 to 5.063)            | 4.730 (4.068 to 5.393) | 6.309 (4.459 to 8.160)            | 4.571 (3.063 to 6.079) |
| Indian           | 3.504 (3.304 to 3.704)            | 3.338 (3.186 to 3.490) | 3.705 (3.289 to 4.121)            | 2.826 (2.504 to 3.148) |
| Mixed            | 4.039 (3.612 to 4.466)            | 4.171 (3.818 to 4.525) | 5.267 (4.447 to 6.086)            | 3.900 (3.336 to 4.464) |
| Other            | 3.994 (3.701 to 4.286)            | 3.725 (3.502 to 3.948) | 3.317 (2.786 to 3.848)            | 3.070 (2.640 to 3.500) |
| Pakistani        | 3.567 (3.240 to 3.895)            | 3.381 (3.148 to 3.615) | 3.362 (2.832 to 3.892)            | 2.623 (2.267 to 2.979) |
| White British    | 3.487 (3.456 to 3.517)            | 3.761 (3.729 to 3.792) | 3.595 (3.556 to 3.633)            | 3.993 (3.945 to 4.041) |

|                          |                        |                        |                        |                        |
|--------------------------|------------------------|------------------------|------------------------|------------------------|
| White other              | 3.749 (3.614 to 3.884) | 4.007 (3.857 to 4.158) | 3.902 (3.667 to 4.137) | 4.223 (3.929 to 4.517) |
|                          |                        |                        |                        |                        |
| <b>Townsend quintile</b> |                        |                        |                        |                        |
| 1 (most affluent)        | 3.667 (3.591 to 3.744) | 3.738 (3.674 to 3.803) | 3.954 (3.863 to 4.045) | 4.253 (4.153 to 4.353) |
| 2                        | 3.905 (3.826 to 3.985) | 3.875 (3.809 to 3.940) | 3.640 (3.558 to 3.722) | 3.686 (3.605 to 3.766) |
| 3                        | 3.764 (3.690 to 3.838) | 4.006 (3.931 to 4.082) | 3.819 (3.727 to 3.911) | 3.562 (3.476 to 3.647) |
| 4                        | 3.364 (3.304 to 3.424) | 4.070 (3.997 to 4.143) | 3.803 (3.706 to 3.899) | 3.664 (3.570 to 3.758) |
| 5 (most deprived)        | 3.274 (3.218 to 3.330) | 3.920 (3.854 to 3.985) | 3.601 (3.509 to 3.693) | 3.696 (3.585 to 3.807) |

**Supplementary Table 7: R-squared of the risk models to predict risk of COVID-19 death in the validation cohort by subgroup**

|                  | Period 1 (24/01/2020 -30/04/2020) |                        | Period 2 (01/05/2020 -28/07/2020) |                        |
|------------------|-----------------------------------|------------------------|-----------------------------------|------------------------|
|                  | COVID -19 death females           | COVID -19 death males  | COVID -19 death females           | COVID -19 death males  |
| <b>Age band</b>  |                                   |                        |                                   |                        |
| 19-40            | 0.530 (0.438 to 0.607)            | 0.608 (0.534 to 0.669) | 0.574 (0.388 to 0.699)            | 0.451 (0.265 to 0.596) |
| 40-45            | 0.606 (0.501 to 0.686)            | 0.539 (0.443 to 0.617) | 0.306 (0.089 to 0.508)            | 0.371 (0.175 to 0.537) |
| 45-50            | 0.628 (0.562 to 0.683)            | 0.565 (0.502 to 0.619) | 0.480 (0.327 to 0.600)            | 0.454 (0.319 to 0.564) |
| 50-55            | 0.622 (0.574 to 0.664)            | 0.570 (0.523 to 0.611) | 0.479 (0.356 to 0.579)            | 0.431 (0.338 to 0.513) |
| 55-60            | 0.586 (0.542 to 0.625)            | 0.513 (0.474 to 0.548) | 0.475 (0.382 to 0.555)            | 0.495 (0.429 to 0.554) |
| 60-65            | 0.618 (0.584 to 0.648)            | 0.549 (0.520 to 0.577) | 0.489 (0.418 to 0.552)            | 0.469 (0.412 to 0.521) |
| 65-70            | 0.586 (0.555 to 0.614)            | 0.558 (0.533 to 0.582) | 0.464 (0.407 to 0.516)            | 0.511 (0.468 to 0.551) |
| 70-75            | 0.641 (0.619 to 0.661)            | 0.552 (0.532 to 0.572) | 0.630 (0.598 to 0.658)            | 0.580 (0.551 to 0.607) |
| 75-80            | 0.619 (0.601 to 0.636)            | 0.545 (0.529 to 0.561) | 0.590 (0.562 to 0.616)            | 0.558 (0.533 to 0.581) |
| 80-85            | 0.559 (0.543 to 0.574)            | 0.521 (0.506 to 0.536) | 0.555 (0.533 to 0.575)            | 0.540 (0.518 to 0.561) |
| 85-90            | 0.491 (0.475 to 0.507)            | 0.436 (0.419 to 0.452) | 0.475 (0.453 to 0.496)            | 0.419 (0.394 to 0.443) |
| 90+              | 0.332 (0.314 to 0.350)            | 0.333 (0.313 to 0.353) | 0.296 (0.276 to 0.316)            | 0.302 (0.273 to 0.331) |
|                  |                                   |                        |                                   |                        |
| <b>Ethnicity</b> |                                   |                        |                                   |                        |
| Bangladeshi      | 0.731 (0.671 to 0.777)            | 0.846 (0.818 to 0.869) | 0.762 (0.563 to 0.857)            | 0.656 (0.506 to 0.754) |
| Black African    | 0.752 (0.710 to 0.786)            | 0.738 (0.709 to 0.763) | 0.626 (0.448 to 0.740)            | 0.642 (0.547 to 0.714) |
| Black Caribbean  | 0.790 (0.765 to 0.812)            | 0.737 (0.717 to 0.755) | 0.763 (0.693 to 0.813)            | 0.724 (0.671 to 0.766) |
| Chinese          | 0.823 (0.771 to 0.860)            | 0.842 (0.798 to 0.874) | 0.905 (0.826 to 0.941)            | 0.833 (0.691 to 0.898) |
| Indian           | 0.746 (0.723 to 0.766)            | 0.727 (0.708 to 0.744) | 0.766 (0.721 to 0.802)            | 0.656 (0.600 to 0.703) |
| Mixed            | 0.796 (0.757 to 0.826)            | 0.806 (0.777 to 0.830) | 0.869 (0.825 to 0.898)            | 0.784 (0.727 to 0.826) |
| Other            | 0.792 (0.766 to 0.814)            | 0.768 (0.745 to 0.788) | 0.724 (0.649 to 0.780)            | 0.692 (0.625 to 0.745) |
| Pakistani        | 0.752 (0.715 to 0.784)            | 0.732 (0.703 to 0.757) | 0.730 (0.657 to 0.783)            | 0.622 (0.551 to 0.679) |
| White British    | 0.744 (0.740 to 0.747)            | 0.771 (0.768 to 0.774) | 0.755 (0.751 to 0.759)            | 0.792 (0.788 to 0.796) |



|                          |                        |                        |                        |                        |
|--------------------------|------------------------|------------------------|------------------------|------------------------|
| White other              | 0.770 (0.757 to 0.783) | 0.793 (0.780 to 0.805) | 0.784 (0.762 to 0.803) | 0.810 (0.787 to 0.830) |
| <b>Townsend quintile</b> |                        |                        |                        |                        |
| 1 (most affluent)        | 0.763 (0.755 to 0.770) | 0.769 (0.763 to 0.775) | 0.789 (0.781 to 0.796) | 0.812 (0.805 to 0.819) |
| 2                        | 0.785 (0.777 to 0.791) | 0.782 (0.776 to 0.787) | 0.760 (0.751 to 0.768) | 0.764 (0.756 to 0.772) |
| 3                        | 0.772 (0.765 to 0.779) | 0.793 (0.787 to 0.799) | 0.777 (0.768 to 0.785) | 0.752 (0.743 to 0.760) |
| 4                        | 0.730 (0.723 to 0.737) | 0.798 (0.792 to 0.804) | 0.775 (0.766 to 0.784) | 0.762 (0.753 to 0.771) |
| 5 (most deprived)        | 0.719 (0.712 to 0.726) | 0.786 (0.780 to 0.791) | 0.756 (0.746 to 0.765) | 0.765 (0.754 to 0.776) |

**Supplementary Table 8: Brier score the risk models to predict risk of COVID-19 death in the validation cohort by subgroup**

|                  | Period 1 (24/01/2020 - 30/04/2020) |         | Period 2 (01/05/2020 - 28/07/2020) |         |
|------------------|------------------------------------|---------|------------------------------------|---------|
|                  | females                            | males   | females                            | males   |
| <b>Age band</b>  |                                    |         |                                    |         |
| 19-40            | 0.00003                            | 0.00003 | 0.00001                            | 0.00001 |
| 40-45            | 0.00007                            | 0.00011 | 0.00003                            | 0.00004 |
| 45-50            | 0.00013                            | 0.00020 | 0.00004                            | 0.00007 |
| 50-55            | 0.00021                            | 0.00034 | 0.00006                            | 0.00013 |
| 55-60            | 0.00033                            | 0.00062 | 0.00011                            | 0.00021 |
| 60-65            | 0.00057                            | 0.00110 | 0.00020                            | 0.00036 |
| 65-70            | 0.00083                            | 0.00178 | 0.00037                            | 0.00058 |
| 70-75            | 0.00136                            | 0.00284 | 0.00063                            | 0.00111 |
| 75-80            | 0.00295                            | 0.00551 | 0.00142                            | 0.00235 |
| 80-85            | 0.00599                            | 0.01058 | 0.00332                            | 0.00494 |
| 85-90            | 0.01037                            | 0.01779 | 0.00671                            | 0.00887 |
| 90+              | 0.01882                            | 0.02999 | 0.01419                            | 0.01743 |
|                  |                                    |         |                                    |         |
| <b>Ethnicity</b> |                                    |         |                                    |         |
| Bangladeshi      | 0.00081                            | 0.00193 | 0.00015                            | 0.00032 |
| Black African    | 0.00099                            | 0.00213 | 0.00013                            | 0.00038 |
| Black Caribbean  | 0.00253                            | 0.00534 | 0.00041                            | 0.00100 |
| Chinese          | 0.00076                            | 0.00155 | 0.00031                            | 0.00026 |
| Indian           | 0.00121                            | 0.00218 | 0.00041                            | 0.00052 |
| Mixed            | 0.00054                            | 0.00079 | 0.00020                            | 0.00029 |
| Other            | 0.00097                            | 0.00184 | 0.00025                            | 0.00039 |
| Pakistani        | 0.00087                            | 0.00161 | 0.00024                            | 0.00050 |
| White British    | 0.00130                            | 0.00178 | 0.00080                            | 0.00085 |
| White other      | 0.00100                            | 0.00160 | 0.00038                            | 0.00051 |

| <b>Townsend quintile</b> |         |         |         |         |
|--------------------------|---------|---------|---------|---------|
| 1 (most affluent)        | 0.00104 | 0.00161 | 0.00069 | 0.00082 |
| 2                        | 0.00108 | 0.00165 | 0.00071 | 0.00082 |
| 3                        | 0.00125 | 0.00171 | 0.00074 | 0.00079 |
| 4                        | 0.00142 | 0.00186 | 0.00075 | 0.00077 |
| 5 (most deprived)        | 0.00155 | 0.00229 | 0.00067 | 0.00074 |

**Supplementary Table 9 Sensitivity for covid-19 related death by sex at different absolute risk thresholds**

| Top centile                                               | Total patients in each centile | Absolute risk centile cut-off (%) | Total deaths in each absolute risk centile | Cumulative % deaths based on absolute risk (sensitivity <sup>†</sup> ) |
|-----------------------------------------------------------|--------------------------------|-----------------------------------|--------------------------------------------|------------------------------------------------------------------------|
| <b>Men, Period 1 (24 January 2020 to 30 April 2020)</b>   |                                |                                   |                                            |                                                                        |
| 1                                                         | 165998                         | 0.9195                            | 5169                                       | 33.71                                                                  |
| 2                                                         | 165999                         | 0.5593                            | 1968                                       | 46.54                                                                  |
| 3                                                         | 165999                         | 0.4197                            | 1327                                       | 55.20                                                                  |
| 4                                                         | 165999                         | 0.3414                            | 926                                        | 61.24                                                                  |
| 5                                                         | 165998                         | 0.2890                            | 721                                        | 65.94                                                                  |
| 6                                                         | 165999                         | 0.2506                            | 578                                        | 69.71                                                                  |
| 7                                                         | 165999                         | 0.2207                            | 472                                        | 72.79                                                                  |
| 8                                                         | 165999                         | 0.1965                            | 390                                        | 75.33                                                                  |
| 9                                                         | 165998                         | 0.1763                            | 359                                        | 77.67                                                                  |
| 10                                                        | 165999                         | 0.1593                            | 306                                        | 79.67                                                                  |
| 11                                                        | 165999                         | 0.1447                            | 239                                        | 81.22                                                                  |
| 12                                                        | 165999                         | 0.1319                            | 258                                        | 82.91                                                                  |
| 13                                                        | 165998                         | 0.1206                            | 207                                        | 84.26                                                                  |
| 14                                                        | 165999                         | 0.1107                            | 191                                        | 85.50                                                                  |
| 15                                                        | 165999                         | 0.1019                            | 172                                        | 86.62                                                                  |
| 16                                                        | 165999                         | 0.0939                            | 163                                        | 87.69                                                                  |
| 17                                                        | 165998                         | 0.0868                            | 128                                        | 88.52                                                                  |
| 18                                                        | 165999                         | 0.0804                            | 135                                        | 89.40                                                                  |
| 19                                                        | 165999                         | 0.0746                            | 115                                        | 90.15                                                                  |
| 20                                                        | 165999                         | 0.0693                            | 106                                        | 90.84                                                                  |
| 21                                                        | 165998                         | 0.0645                            | 97                                         | 91.48                                                                  |
| 22                                                        | 165999                         | 0.0600                            | 79                                         | 91.99                                                                  |
| 23                                                        | 165999                         | 0.0559                            | 86                                         | 92.55                                                                  |
| 24                                                        | 165999                         | 0.0520                            | 59                                         | 92.94                                                                  |
| 25                                                        | 165998                         | 0.0483                            | 71                                         | 93.40                                                                  |
| <b>Women, Period 1 (24 January 2020 to 30 April 2020)</b> |                                |                                   |                                            |                                                                        |
| 1                                                         | 182977                         | 0.7353                            | 4227                                       | 36.28                                                                  |
| 2                                                         | 182978                         | 0.4011                            | 1752                                       | 51.32                                                                  |
| 3                                                         | 182978                         | 0.2862                            | 1049                                       | 60.32                                                                  |
| 4                                                         | 182977                         | 0.2263                            | 728                                        | 66.57                                                                  |
| 5                                                         | 182978                         | 0.1884                            | 594                                        | 71.67                                                                  |
| 6                                                         | 182978                         | 0.1611                            | 443                                        | 75.47                                                                  |
| 7                                                         | 182978                         | 0.1401                            | 331                                        | 78.31                                                                  |
| 8                                                         | 182977                         | 0.1231                            | 273                                        | 80.65                                                                  |
| 9                                                         | 182978                         | 0.1090                            | 232                                        | 82.65                                                                  |
| 10                                                        | 182978                         | 0.0971                            | 219                                        | 84.52                                                                  |
| 11                                                        | 182978                         | 0.0869                            | 151                                        | 85.82                                                                  |
| 12                                                        | 182977                         | 0.0781                            | 127                                        | 86.91                                                                  |
| 13                                                        | 182978                         | 0.0705                            | 140                                        | 88.11                                                                  |
| 14                                                        | 182978                         | 0.0637                            | 120                                        | 89.14                                                                  |
| 15                                                        | 182977                         | 0.0577                            | 108                                        | 90.07                                                                  |

|    |        |        |    |       |
|----|--------|--------|----|-------|
| 16 | 182978 | 0.0525 | 77 | 90.73 |
| 17 | 182978 | 0.0478 | 81 | 91.43 |
| 18 | 182978 | 0.0437 | 69 | 92.02 |
| 19 | 182977 | 0.0401 | 63 | 92.56 |
| 20 | 182978 | 0.0369 | 60 | 93.07 |
| 21 | 182978 | 0.0340 | 60 | 93.59 |
| 22 | 182978 | 0.0313 | 53 | 94.04 |
| 23 | 182977 | 0.0289 | 38 | 94.37 |
| 24 | 182978 | 0.0267 | 46 | 94.76 |
| 25 | 182978 | 0.0247 | 32 | 95.04 |

**Men, Period 2 (1 May 2020 to 28 July 2020)**

|    |        |        |      |       |
|----|--------|--------|------|-------|
| 1  | 165275 | 0.8429 | 2531 | 38.25 |
| 2  | 165275 | 0.5263 | 891  | 51.72 |
| 3  | 165275 | 0.3997 | 551  | 60.04 |
| 4  | 165275 | 0.3272 | 423  | 66.43 |
| 5  | 165275 | 0.2781 | 309  | 71.10 |
| 6  | 165275 | 0.2419 | 267  | 75.14 |
| 7  | 165275 | 0.2135 | 207  | 78.27 |
| 8  | 165275 | 0.1904 | 160  | 80.69 |
| 9  | 165275 | 0.1712 | 117  | 82.45 |
| 10 | 165275 | 0.1548 | 103  | 84.01 |
| 11 | 165275 | 0.1407 | 89   | 85.36 |
| 12 | 165275 | 0.1284 | 79   | 86.55 |
| 13 | 165275 | 0.1175 | 88   | 87.88 |
| 14 | 165275 | 0.1079 | 73   | 88.98 |
| 15 | 165276 | 0.0994 | 49   | 89.72 |
| 16 | 165275 | 0.0917 | 35   | 90.25 |
| 17 | 165275 | 0.0848 | 50   | 91.01 |
| 18 | 165275 | 0.0786 | 38   | 91.58 |
| 19 | 165275 | 0.0730 | 51   | 92.35 |
| 20 | 165275 | 0.0678 | 25   | 92.73 |
| 21 | 165275 | 0.0631 | 24   | 93.09 |
| 22 | 165275 | 0.0587 | 37   | 93.65 |
| 23 | 165275 | 0.0547 | 25   | 94.03 |
| 24 | 165275 | 0.0509 | 32   | 94.51 |
| 25 | 165275 | 0.0473 | 21   | 94.83 |

**Women, Period 2 (1 May 2020 to 28 July 2020)**

|    |        |        |      |       |
|----|--------|--------|------|-------|
| 1  | 182260 | 0.6629 | 2793 | 42.58 |
| 2  | 182261 | 0.3734 | 994  | 57.73 |
| 3  | 182260 | 0.2710 | 591  | 66.74 |
| 4  | 182261 | 0.2162 | 367  | 72.33 |
| 5  | 182261 | 0.1809 | 317  | 77.16 |
| 6  | 182260 | 0.1552 | 229  | 80.66 |
| 7  | 182261 | 0.1353 | 152  | 82.97 |
| 8  | 182261 | 0.1190 | 147  | 85.21 |
| 9  | 182260 | 0.1055 | 122  | 87.07 |
| 10 | 182261 | 0.0941 | 83   | 88.34 |

|    |        |        |    |       |
|----|--------|--------|----|-------|
| 11 | 182261 | 0.0843 | 71 | 89.42 |
| 12 | 182260 | 0.0758 | 74 | 90.55 |
| 13 | 182261 | 0.0684 | 56 | 91.40 |
| 14 | 182261 | 0.0619 | 58 | 92.29 |
| 15 | 182260 | 0.0562 | 31 | 92.76 |
| 16 | 182261 | 0.0511 | 40 | 93.37 |
| 17 | 182261 | 0.0466 | 36 | 93.92 |
| 18 | 182260 | 0.0427 | 36 | 94.47 |
| 19 | 182261 | 0.0392 | 21 | 94.79 |
| 20 | 182261 | 0.0360 | 21 | 95.11 |
| 21 | 182260 | 0.0332 | 23 | 95.46 |
| 22 | 182261 | 0.0306 | 22 | 95.79 |
| 23 | 182260 | 0.0283 | 19 | 96.08 |
| 24 | 182261 | 0.0262 | 13 | 96.28 |
| 25 | 182261 | 0.0242 | 18 | 96.55 |

Risk threshold is the centile value giving the cut-off of predicted risk over 90 days for defining each group

Sensitivity is percentage of total deaths over 90 days that occurred within the group of patients above the predicted risk threshold

Supplementary Figure 1: Predicted and observed risk of covid-19 related death in first study period (24 January to 30 April 2020) in patients registered with practices using TPP

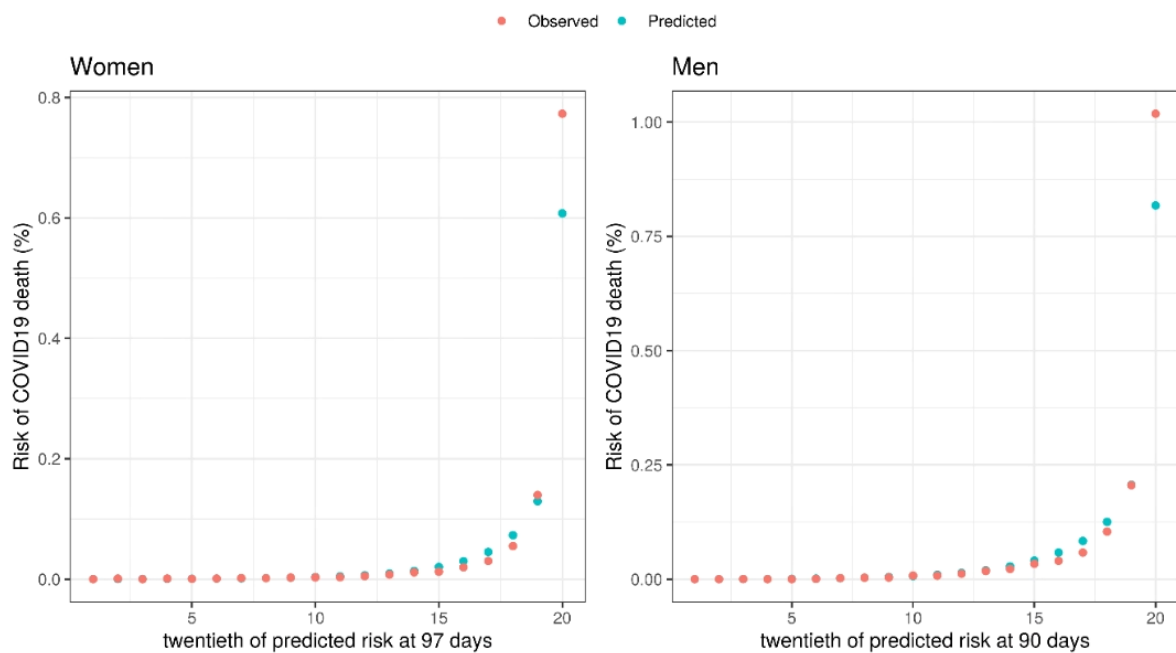

Supplementary Figure 2: Sensitivity for Covid-19 related death in validation cohort for period 1 (24 January 2020 – 30 April 2020) and period 2 (1 May 2020 – 28 July 2020) based on relative risks

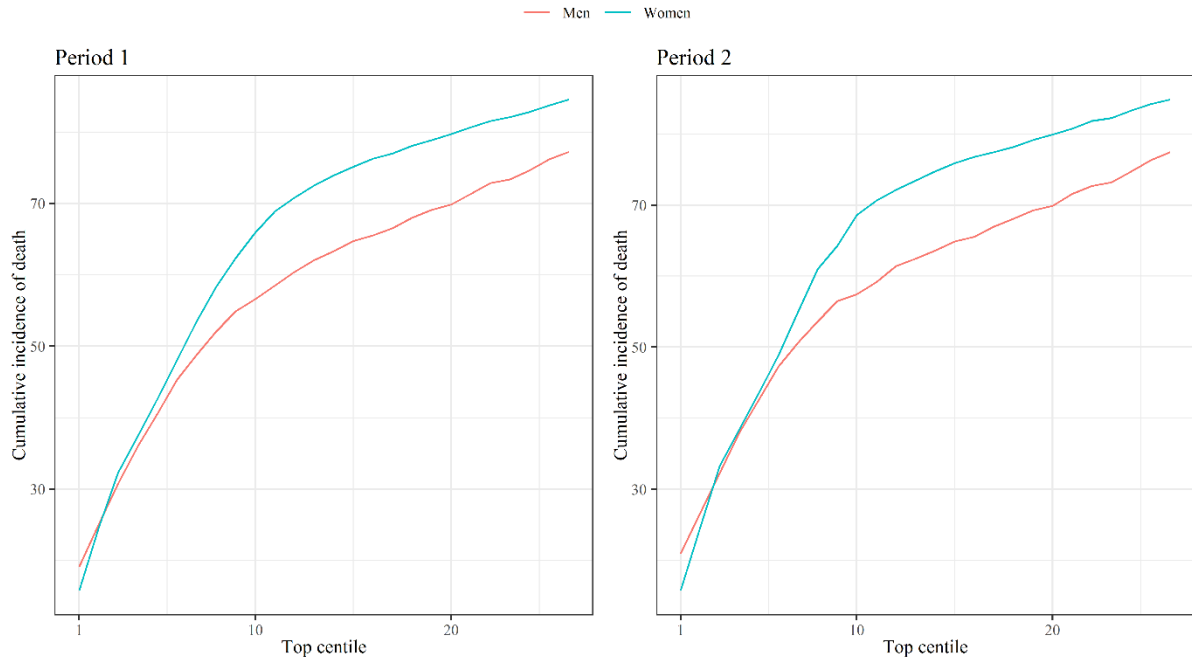

Centiles based on predicted relative risks compared with someone of the same age/sex with no risk factors. Sensitivity is percentage of total deaths in the period that occurred within the group of patients above the predicted risk threshold.

Supplementary Figure 3: Distribution of predicted risk of COVID-19 death by age group and sex for period 1 (24 January 2020 – 30 April 2020) and period 2 (1 May 2020 – 28 July 2020)

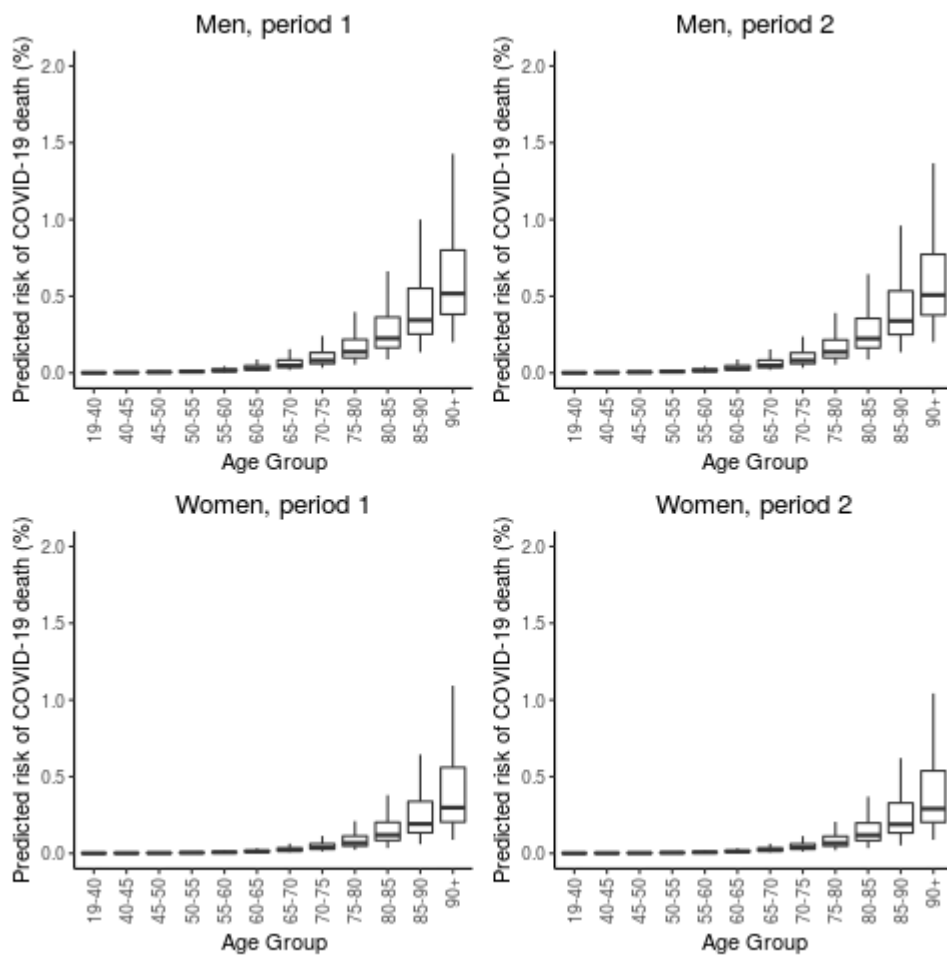

The median is shown as the bold line within the hinge, which represents the interquartile range (IQR). The upper whisker extends from the hinge to the largest value no further than one and a half times the IQR from the hinge.
